# Supplementary material for: Evidence of high-elevation amplification versus Arctic amplification
Source: PubMed Central journal article supplement (PMC4709741; doi:10.1038/srep19219), 2016-01-12
Supplement: srep19219-s1.pdf [file srep19219-s1.pdf]

# 1 Evidence of high-elevation amplification versus Arctic amplification

2 Qixiang Wang, Xiaohui Fan & Mengben Wang\*

3 Institute of Loess Plateau, Shanxi University, Taiyuan 030006, China.

4 \*Corresponding author: email: mbwang@sxu.edu.cn

## 5 SUPPLEMENTARY INFORMATION

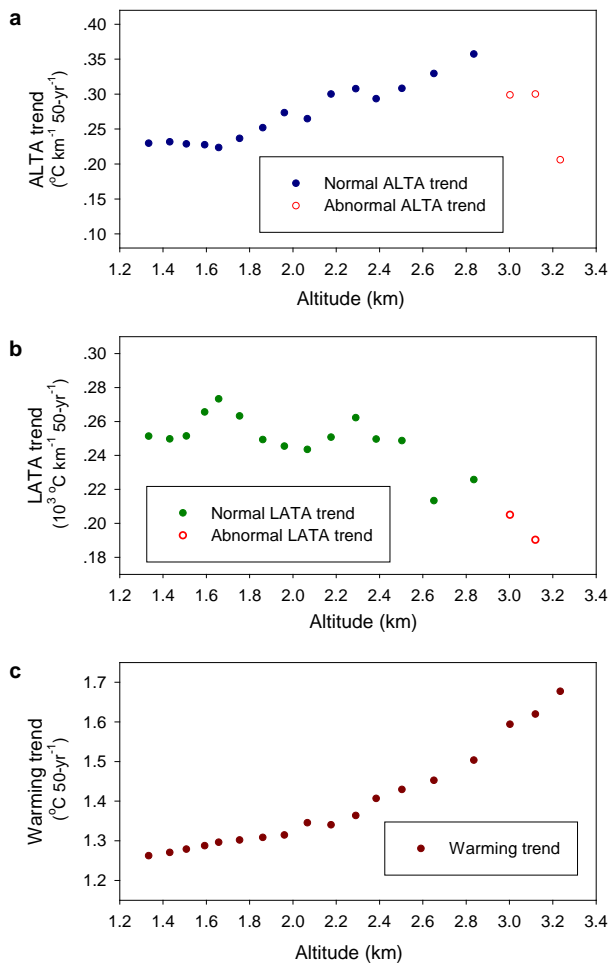

6

7 **Supplementary Figure S1** Changes of (a) altitudinal amplification (ALTA) trend, (b)

8 latitudinal amplification (LATA) trend and (c) warming trend with altitude. The data

9 are obtained from sampling the data of Ele-high by omitting segments from the lower

10 limit of altitudinal gradient in 100 m steps (see **Supplementary Table S3** for details).

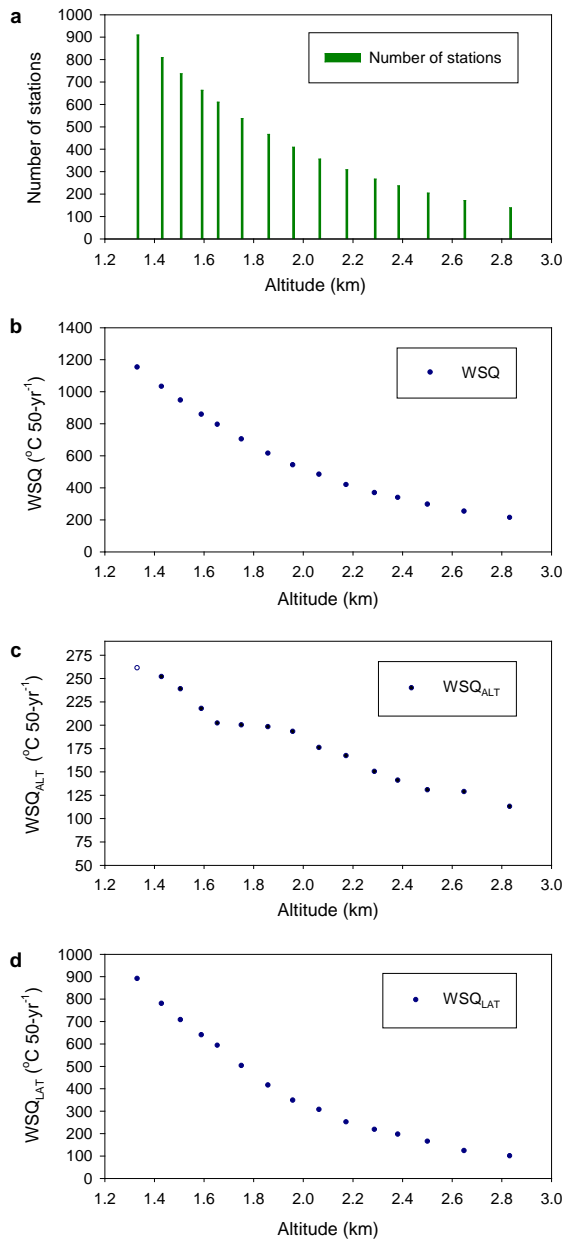

1

2 **Supplementary Figure S2** Changes of (a) number of stations, (b) total warming  
 3 signal quantity (WSQ), (c) altitudinal warming signal quantity (WSQ<sub>ALT</sub>), and (d)  
 4 latitudinal warming signal quantity (WSQ<sub>LAT</sub>) with altitude. The data on the number  
 5 of stations are obtained from sampling the data of Ele-high by omitting segments  
 6 from the lower limit of altitudinal gradient in 100 m steps (see **Supplementary Table**  
 7 **S3** for details on the data, and **Methods** on calculations of WSQ, WSQ<sub>ALT</sub> and  
 8 WSQ<sub>LAT</sub>).

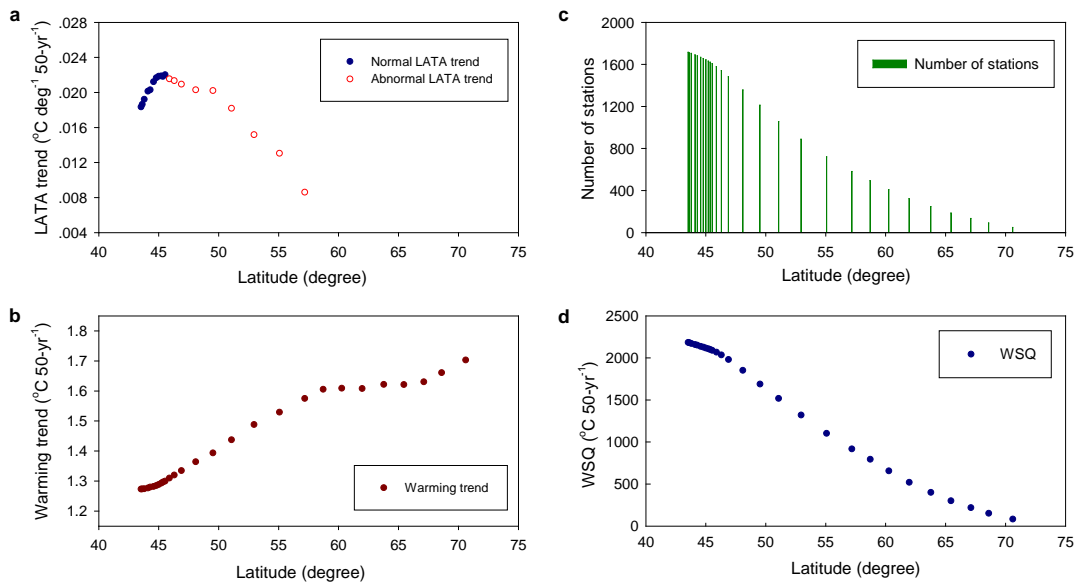

1

2 **Supplementary Figure S3** Changes of (a) latitudinal amplification (LATA) trend, (b)  
 3 warming trend, (c) number of stations, and (d) the warming signal quantity (WSQ)  
 4 with latitude. The data for plots a-c are obtained from sampling the data of  
 5 NH-Ele-low by omitting segments from the lower limit of latitudinal gradient in  
 6 2.5-deg steps (see **Supplementary Table S4** for details on the data, and **Methods** on  
 7 calculation of WSQ).

1 **Supplementary Table S1** Statistics of station altitude (in km) and latitude (in deg)  
 2 for the six groups of stations used in this study.

| Scale                      | Code           | Short name                                     | Name of station group                                                                   | Var.   | Mean   | Mini.  | Max.   | n    |
|----------------------------|----------------|------------------------------------------------|-----------------------------------------------------------------------------------------|--------|--------|--------|--------|------|
| Global scale               | A <sub>1</sub> | Ele-high                                       | High-elevation stations                                                                 | Alt.   | 1.3334 | 0.5050 | 4.7000 | 910  |
|                            |                |                                                | (>500 m) across the globe                                                               | Lat.   | 37.31  | 3.40   | 63.25  |      |
|                            | A <sub>2</sub> | Ele-low                                        | Low-elevation counterparts                                                              | Alt.   | 0.1655 | 0.0010 | 0.5000 | 1732 |
|                            |                |                                                | of Ele-high [low-elevation stations ( $\leq 500$ m) located in the same latitudes]      | Lat.   | 40.78  | 3.60   | 63.22  |      |
| Northern Hemispheric scale | B <sub>1</sub> | Lat-high                                       | Low-elevation stations                                                                  | Alt.   | 0.0927 | 0.0020 | 0.3990 | 184  |
|                            |                |                                                | ( $\leq 500$ m) in the Arctic region                                                    | Lat.   | 65.48  | 60.13  | 82.05  |      |
|                            | B <sub>2</sub> | Lat-low                                        | Lower latitude counterparts                                                             | Alt.   | 0.1734 | 0.0010 | 0.5000 | 1531 |
|                            |                |                                                | of Lat-high [lower latitude stations ( $\leq 60^\circ\text{N}$ ) in the same altitudes] | Lat.   | 40.89  | 1.48   | 60.00  |      |
|                            | C <sub>1</sub> | Arctic stations                                | Stations in the Arctic                                                                  | Alt.   | 0.1020 | 0.0020 | 0.7410 | 187  |
|                            |                |                                                | region (North of $60^\circ\text{N}$ )                                                   | Lat.   | 65.43  | 60.05  | 82.05  |      |
| C <sub>2</sub>             | NH-Ele-low     | Low-elevation stations                         | Alt.                                                                                    | 0.1648 | 0.0010 | 0.5000 | 1715   |      |
|                            |                | ( $\leq 500$ m) across the Northern Hemisphere | Lat.                                                                                    | 43.53  | 1.48   | 82.05  |        |      |
| Global scale               | All stations   | All available stations around the globe        | Alt.                                                                                    | 0.5429 | 0.0010 | 4.7000 | 2781   |      |
|                            |                |                                                | Lat.                                                                                    | 40.81  | 1.48   | 82.50  |        |      |

1 **Supplementary Table S2** Number of stations with significant positive (SP),  
 2 non-significant positive (NSP), positive (SP+NSP), significant negative (SN),  
 3 non-significant negative (NSN), and negative (SN+NSN) trends for the six groups of  
 4 stations used in this study.

| Scale                | Code | Short name      | SP          | NSP        | Positive    | SN      | NSN      | Negative | n    |
|----------------------|------|-----------------|-------------|------------|-------------|---------|----------|----------|------|
| Global scale         | A1   | Ele-high        | 786 (86.4)  | 118 (13.0) | 904 (99.4)  | 3 (0.3) | 3 (0.3)  | 6 (0.6)  | 910  |
|                      | A2   | Ele-low         | 1462 (84.4) | 239 (13.8) | 1701 (98.2) | 3 (0.2) | 28 (1.6) | 31 (1.8) | 1732 |
| Northern             | B1   | Lat-high        | 137 (74.5)  | 44 (23.9)  | 181 (98.4)  |         | 3 (1.6)  | 3 (1.6)  | 184  |
| Hemispheric<br>scale | B2   | Lat-low         | 1328 (86.7) | 182 (11.9) | 1510 (98.6) | 2 (0.1) | 19 (1.2) | 21 (1.4) | 1531 |
|                      | C1   | Arctic stations | 139 (74.3)  | 45 (24.1)  | 184 (98.4)  |         | 3 (1.6)  | 3 (1.6)  | 187  |
|                      | C2   | NH-Ele-low      | 1465 (85.4) | 226 (13.2) | 1691 (98.6) | 2 (0.1) | 22 (1.3) | 24 (1.4) | 1715 |
| Global scale         |      | All stations    | 2348 (84.4) | 395 (14.2) | 2743 (98.6) | 6 (0.2) | 32 (1.2) | 38 (1.4) | 2781 |

5 The trend for each station was extracted from the anomalies (relative to the  
 6 1961-1990 mean) using the least squares best-fit method. The trend significance is  
 7 judged using 95% confidence level. The value in parentheses represents the  
 8 percentage of the number of the stations relative to the total number of the stations of  
 9 each group.

1 **Supplementary Table S3** Changes of altitudinal amplification trend and latitudinal  
2 amplification trend derived from sampling the data of Ele-high by omitting segments  
3 from the lower limit of altitudinal gradient in 100 m steps.

| Sample | Alt.<br>extent | Model ( $T_t = a x_1 + b x_2 + c$ ) |                           |          |              |          | Average | Average              | No. of<br>stations | WSQ    |
|--------|----------------|-------------------------------------|---------------------------|----------|--------------|----------|---------|----------------------|--------------------|--------|
|        |                | <i>a</i>                            | <i>b</i> ×10 <sup>3</sup> | <i>c</i> | <i>R</i>     | <i>p</i> | Alt.    | <i>T<sub>t</sub></i> |                    |        |
| Entire | 0.5-4.7 km     | 0.2297                              | 0.2513                    | -0.0882  | <b>0.434</b> | <0.0001  | 1.3334  | 1.262                | 910                | 1148.4 |
| 1      | 0.6-4.7 km     | 0.2315                              | 0.2497                    | -0.0860  | <b>0.430</b> | <0.0001  | 1.4313  | 1.271                | 809                | 1028.2 |
| 2      | 0.7-4.7 km     | 0.2287                              | 0.2515                    | -0.0861  | <b>0.424</b> | <0.0001  | 1.5078  | 1.279                | 737                | 942.6  |
| 3      | 0.8-4.7 km     | 0.2275                              | 0.2656                    | -0.1382  | <b>0.440</b> | <0.0001  | 1.5922  | 1.287                | 663                | 853.3  |
| 4      | 0.9-4.7 km     | 0.2235                              | 0.2733                    | -0.1581  | <b>0.448</b> | <0.0001  | 1.6568  | 1.296                | 610                | 790.6  |
| 5      | 1.0-4.7 km     | 0.2365                              | 0.2632                    | -0.1521  | <b>0.441</b> | <0.0001  | 1.7532  | 1.302                | 537                | 699.2  |
| 6      | 1.1-4.7 km     | 0.2519                              | 0.2493                    | -0.1390  | <b>0.463</b> | <0.0001  | 1.8605  | 1.308                | 466                | 609.5  |
| 7      | 1.2-4.7 km     | 0.2732                              | 0.2454                    | -0.1822  | <b>0.483</b> | <0.0001  | 1.9606  | 1.314                | 409                | 537.4  |
| 8      | 1.3-4.7 km     | 0.2647                              | 0.2435                    | -0.1503  | <b>0.472</b> | <0.0001  | 2.0664  | 1.345                | 356                | 478.8  |
| 9      | 1.4-4.7 km     | 0.2999                              | 0.2507                    | -0.2833  | <b>0.509</b> | <0.0001  | 2.1756  | 1.340                | 309                | 414.1  |
| 10     | 1.5-4.7 km     | 0.3077                              | 0.2622                    | -0.3510  | <b>0.522</b> | <0.0001  | 2.2899  | 1.363                | 267                | 363.9  |
| 11     | 1.6-4.7 km     | 0.2934                              | 0.2496                    | -0.2575  | <b>0.489</b> | <0.0001  | 2.3841  | 1.407                | 237                | 333.5  |
| 12     | 1.7-4.7 km     | 0.3080                              | 0.2487                    | -0.3024  | <b>0.485</b> | <0.0001  | 2.5032  | 1.429                | 204                | 291.5  |
| 13     | 1.8-4.7 km     | 0.3293                              | 0.2133                    | -0.2417  | <b>0.471</b> | <0.0001  | 2.6512  | 1.453                | 171                | 248.5  |
| 14     | 1.9-4.7 km     | 0.3571                              | 0.2257                    | -0.3856  | <b>0.470</b> | <0.0001  | 2.8351  | 1.503                | 139                | 208.9  |
| 15     | 2.0-4.7 km     | 0.2986                              | 0.2050                    | -0.0976  | <b>0.381</b> | =0.0001  | 3.0019  | 1.594                | 117                | 186.5  |
| 16     | 2.1-4.7 km     | 0.2999                              | 0.1903                    | -0.0470  | <b>0.363</b> | =0.0008  | 3.1197  | 1.620                | 104                | 168.5  |
| 17     | 2.2-4.7 km     | 0.2060                              | –                         | 1.0108   | <b>0.226</b> | =0.0293  | 3.2343  | 1.677                | 93                 | 156.0  |
| 18     | 2.3-4.7 km     | –                                   | –                         | –        | –            | –        | 3.3142  | 1.718                | 86                 | 147.7  |

4 The model between temperature trends ( $T_t$ , in °C 50-yr<sup>-1</sup>) and altitudes ( $x_1$ , in km) and  
5 latitudes ( $x_2$ , in km) for each sample is determined using the stepwise regression  
6 method. Multiple correlation coefficient ( $R$ ) is given with two-tailed  $p$  value in next  
7 column. Significant coefficient, at the 95 % confidence level, is set in bold. For  
8 samples 15 to 17, the multiple correlation coefficients (as well as the rates of  
9 altitudinal amplification trend and latitudinal amplification trend) are obviously  
10 smaller than those just before; and for sample 18, neither altitudinal amplification  
11 trend nor latitudinal amplification trend can be detected further. Also shown are the  
12 average altitude (km), average  $T_t$  (°C 50-yr<sup>-1</sup>), number of stations, and warming signal  
13 quantity (°C 50-yr<sup>-1</sup>, WSQ) for each sample.

1 **Supplementary Table S4** Change of latitudinal amplification trend derived from  
 2 sampling the data of NH-Ele-low by omitting segments from the lower limit of  
 3 latitudinal gradient in 2.5-deg steps.

| Sample | Latitude<br>extent | Model ( $T_t = b x_2 + c$ ) |        |              |         | Average<br>lat. | Average<br>$T_t$ | No. of<br>stations | WSQ    |
|--------|--------------------|-----------------------------|--------|--------------|---------|-----------------|------------------|--------------------|--------|
|        |                    | $b \times 10^3$             | $c$    | $r$          | $p$     |                 |                  |                    |        |
| Entire | 0°–82.5°N          | 0.1647                      | 0.4748 | <b>0.425</b> | <0.0001 | 43.53           | 1.273            | 1715               | 2183.1 |
| 1      | 2.5°–82.5° N       | 0.1675                      | 0.4602 | <b>0.428</b> | <0.0001 | 43.62           | 1.274            | 1711               | 2179.0 |
| 2      | 5.0°– 82.5° N      | 0.1726                      | 0.4330 | <b>0.433</b> | <0.0001 | 43.79           | 1.274            | 1704               | 2171.5 |
| 3      | 7.5°–82.5° N       | 0.1809                      | 0.3885 | <b>0.438</b> | <0.0001 | 44.10           | 1.277            | 1690               | 2157.6 |
| 4      | 10.0°–82.5° N      | 0.1823                      | 0.3814 | <b>0.433</b> | <0.0001 | 44.29           | 1.280            | 1681               | 2151.5 |
| 5      | 12.5°– 82.5° N     | 0.1906                      | 0.3363 | <b>0.439</b> | <0.0001 | 44.57           | 1.282            | 1667               | 2137.0 |
| 6      | 15.0°–82.5° N      | 0.1947                      | 0.3139 | <b>0.438</b> | <0.0001 | 44.79           | 1.285            | 1655               | 2126.3 |
| 7      | 17.5°–82.5° N      | 0.1963                      | 0.3055 | <b>0.434</b> | <0.0001 | 45.00           | 1.289            | 1643               | 2117.2 |
| 8      | 20.0°–82.5° N      | 0.1966                      | 0.3037 | <b>0.430</b> | <0.0001 | 45.21           | 1.293            | 1630               | 2107.7 |
| 9      | 22.5°–82.5° N      | 0.1961                      | 0.3063 | <b>0.424</b> | <0.0001 | 45.36           | 1.297            | 1620               | 2100.5 |
| 10     | 25.0°–82.5° N      | 0.1979                      | 0.2966 | <b>0.422</b> | <0.0001 | 45.53           | 1.299            | 1607               | 2088.2 |
| 11     | 27.5°–82.5° N      | 0.1935                      | 0.3213 | <b>0.406</b> | <0.0001 | 45.88           | 1.310            | 1578               | 2066.8 |
| 12     | 30.0°–82.5° N      | 0.1917                      | 0.3317 | <b>0.395</b> | <0.0001 | 46.30           | 1.320            | 1541               | 2033.9 |
| 13     | 32.5°–82.5° N      | 0.1882                      | 0.3527 | <b>0.379</b> | <0.0001 | 46.89           | 1.335            | 1483               | 1979.5 |
| 14     | 35.0°–82.5° N      | 0.1823                      | 0.3882 | <b>0.349</b> | <0.0001 | 48.09           | 1.364            | 1357               | 1851.2 |
| 15     | 37.5°–82.5° N      | 0.1815                      | 0.3934 | <b>0.330</b> | <0.0001 | 49.51           | 1.394            | 1211               | 1687.9 |
| 16     | 40.0°–82.5° N      | 0.1634                      | 0.5086 | <b>0.285</b> | <0.0001 | 51.07           | 1.437            | 1056               | 1517.8 |
| 17     | 42.5°–82.5° N      | 0.1364                      | 0.6845 | <b>0.226</b> | <0.0001 | 52.94           | 1.488            | 887                | 1319.9 |
| 18     | 45.0°–82.5° N      | 0.1173                      | 0.8105 | <b>0.178</b> | <0.0001 | 55.07           | 1.529            | 721                | 1102.7 |
| 19     | 47.5°–82.5° N      | 0.0773                      | 1.0825 | <b>0.109</b> | =0.0084 | 57.18           | 1.575            | 582                | 916.5  |
| 20     | 50.0°–82.5° N      | -                           | -      | -            | -       | 58.71           | 1.605            | 494                | 793.1  |

4 The model between temperature trends ( $T_t$ , in °C 50-yr<sup>-1</sup>) and latitudes ( $x_2$ , in km) is  
 5 determined using the simple linear regression method. Pearson correlation coefficient  
 6 ( $r$ ) is given with two-tailed  $p$  value in next column. Significant coefficient, at the 95 %  
 7 confidence level, is set in bold. For samples 11 to 19, the correlation coefficients (as  
 8 well as the rates of latitudinal amplification trends) are obviously smaller than those  
 9 just before; and for sample 20, no latitudinal amplification trend can be detected  
 10 further. Also shown are the average latitude (deg), average  $T_t$  (°C 50-yr<sup>-1</sup>), number of  
 11 stations, and warming signal quantity (°C 50-yr<sup>-1</sup>, WSQ) for each sample.
